# Supplementary material for: Photocatalytic water oxidation via combination of BiVO4–RGO and molecular cobalt catalysts
Source: Royal Society of Chemistry journal article supplement (doi:10.1039/c5cc09588c), 2016-01-01
Supplement: c5cc09588c1.pdf [file c5cc09588c1.pdf]

## *Electronic Supplementary Information*

# **Photocatalytic Water Oxidation by Combination of BiVO<sub>4</sub>-RGO and Molecular Cobalt Catalyst**

Yong Wang,<sup>a</sup> Fei Li,<sup>\*a</sup> Hua Li,<sup>a</sup> Lichen Bai,<sup>a</sup> and Licheng Sun<sup>a,b</sup>

<sup>a</sup>*State Key Laboratory of Fine Chemicals, Dalian University of Technology (DUT),  
DUT-KTH Joint Education and Research Center on Molecular Devices, Dalian  
116024 (China). Fax: (+86)-411-84986245; E-mail: lifei@dlut.edu.cn*

<sup>b</sup>*Department of Chemistry, School of Chemical Science and Engineering, KTH Royal  
Institute of Technology, 10044 Stockholm (Sweden).*

## **Experimental Section**

### **Materials**

4-methoxypyridine, 4-tert-butylpyridine, 4-bromopyridine hydrochloride and 4-cyanopyridine were purchased from Energy Chemicals. Cobalt(II) complexes [Co(salophen)] (**2**, salophen = (*N,N'*-bis(salicylaldehyde)-1,2-phenylenediamine) and [Co(bpy)<sub>2</sub>(OH<sub>2</sub>)<sub>2</sub>](ClO<sub>4</sub>)<sub>2</sub> (**3**, bpy = 2,2'-bipyridine) were synthesized according to the reported methods.<sup>1,2</sup> Bi(NO<sub>3</sub>)<sub>3</sub> · 5H<sub>2</sub>O (99.0%) and pyridine (99.9%) were purchased from Aladdin Chemicals. Graphite powder and V<sub>2</sub>O<sub>5</sub> (99.0%) were purchased from Sinopharm Chemicals. All other chemicals are commercially available.

### **General methods**

SEM micrographs and EDX analysis were conducted with a Nova NanoSEM 450 instrument. X-ray diffraction was collected with a D/max-2400 diffractometer. UV-vis diffuse reflectance spectra measurement was performed on an Evolution 200 spectrophotometer (Thermo, USA). The photoluminescence (PL) emission spectra were measured on a fluorescence spectrometer (FluoroMax-4P, France) at an

excitation wavelength of 400 nm.  $^1\text{H}$  NMR spectra were recorded at 298 K using a Bruker DRX-400 instrument operating at 400 MHz. UV-vis absorption measurement was taken with an Agilent 8453 spectrophotometer.

### **Preparation of $\text{BiVO}_4\text{-RGO}$ composite**

$\text{BiVO}_4\text{-RGO}$  composite was prepared according to a method reported in literature.<sup>3</sup> In detail,  $\text{Bi}(\text{NO}_3)_3 \cdot 5\text{H}_2\text{O}$  (10 mmol),  $\text{V}_2\text{O}_5$  (5 mmol) and graphene oxide (0.162g, GO was prepared based on the Hummer's method<sup>4</sup>) were mixed in 0.75 M  $\text{HNO}_3$  solution (50 mL). The suspension was stirred for 2 days at room temperature and the obtained greenish  $\text{BiVO}_4\text{-GO}$  precursor was collected by filtration and dried at  $110^\circ\text{C}$ . 1mg/mL of  $\text{BiVO}_4\text{-GO}$  in solvent-grade ethanol was employed as a typical concentration, which was irradiated by visible light ( $\lambda > 420$  nm) using a 300 W xenon lamp installed a cut-off filter. The suspension was stirred constantly during irradiation and was bubbled with argon for 3 hours. Finally, the  $\text{BiVO}_4\text{-RGO}$  powders obtained by filtration and dried overnight was characterized by SEM, XRD and DRS (See Figures S2~4).

### **Synthesis of $\text{Co}_4\text{O}_4(\text{O}_2\text{CMe})_4(\text{py})_4$ , (**1-H**).**

Complex **1-H** was synthesized according to a literature procedure.<sup>5</sup>  $\text{Co}(\text{NO}_3)_2 \cdot 6\text{H}_2\text{O}$  (2.90 g, 10 mmol) and  $\text{CH}_3\text{CO}_2\text{Na} \cdot 3\text{H}_2\text{O}$  (2.70 g, 20 mmol) were stirred in methanol (30 mL) and heated to refluxing temperature, and pyridine (0.8 mL, 10 mmol) was added to the stirred reaction mixture. A portion of 30%  $\text{H}_2\text{O}_2$  (5 mL) was added to the reaction mixture dropwise and stirred under refluxing condition for 4 hours. The cooled reaction mixture was concentrated in a rotary evaporator and then the aqueous layer was separated out by adding  $\text{CH}_2\text{Cl}_2$  to it. The light-pink aqueous layer was discarded and the  $\text{CH}_2\text{Cl}_2$  layer was dried over anhydrous  $\text{Na}_2\text{SO}_4$ , and then filtered. After the solvent was removed on a rotary evaporator, the residue was purified by column chromatography on silica gel with dichloromethane-methanol (15:1, V:V) as eluent to obtain the dark green product. Yield: 724 mg (34%).

$^1\text{H}$  NMR (400 MHz,  $\text{D}_2\text{O}$ ):  $\delta$  8.13 (d, 8H), 7.63-7.66 (t, 4H), 7.14 (d, 8H), 2.01 (s, 12H). ESI-MS:  $m/z = 852.67$  [ $\text{M}$ ]<sup>+</sup> (calcd: 851.93).

$\text{Co}_4\text{O}_4(\text{O}_2\text{CMe})_4(4\text{-OMepy})_4$ , (**1-OMe**),  $\text{Co}_4\text{O}_4(\text{O}_2\text{CMe})_4(4\text{-t-Bupy})_4$ , (**1-t-Bu**),  $\text{Co}_4\text{O}_4(\text{O}_2\text{CMe})_4(4\text{-Brpy})_4$ , (**1-Br**) and  $\text{Co}_4\text{O}_4(\text{O}_2\text{CMe})_4(4\text{-CNpy})_4$ , (**1-CN**) were also prepared following the reported methods<sup>5</sup>. The main procedure was similar with preparing complex **1-H** except using 4-methoxypyridine, 4-tert-butylpyridine, 4-bromopyridine hydrochloride and 4-cyanopyridine to replace pyridine, respectively.

### Photocatalytic oxygen evolution

In a typical reaction,  $\text{BiVO}_4\text{-RGO}$  was dispersed in an aqueous solution containing cobalt complex **1-X** (0.25 mM) and  $\text{AgNO}_3$  (15 mM) in a 50 mL Schlenk bottle without any pH adjustment. The solution was deaerated by bubbling argon for 30 min. This hybrid system was irradiated with a 300W xenon lamp equipped with a 420 nm cut-off filter at room temperature. The amount of evolved  $\text{O}_2$  was sampled by syringe from the headspace of cuvette and analyzed by a Techcomp GC 7890T instrument equipped with a 5 Å molecular sieve column and a thermal conductivity detector with argon carrier gas. For the photocatalytic reactions operated at different pH values, nitric acid was added to the aqueous solution to adjust the pH values.

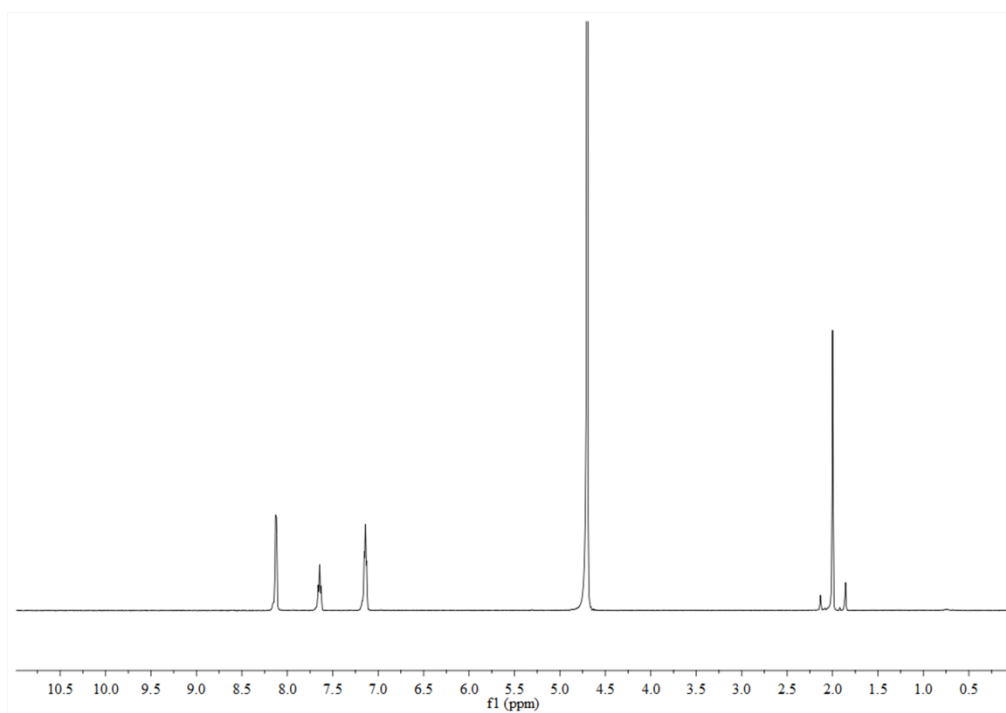

**Figure S1.**  $^1\text{H}$  NMR spectrum of **1-H** in  $\text{D}_2\text{O}$

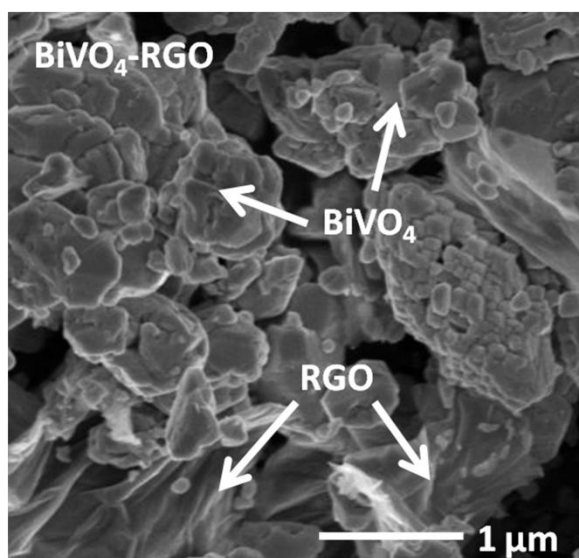

**Figure S2.** SEM image of BiVO<sub>4</sub>-RGO composite.

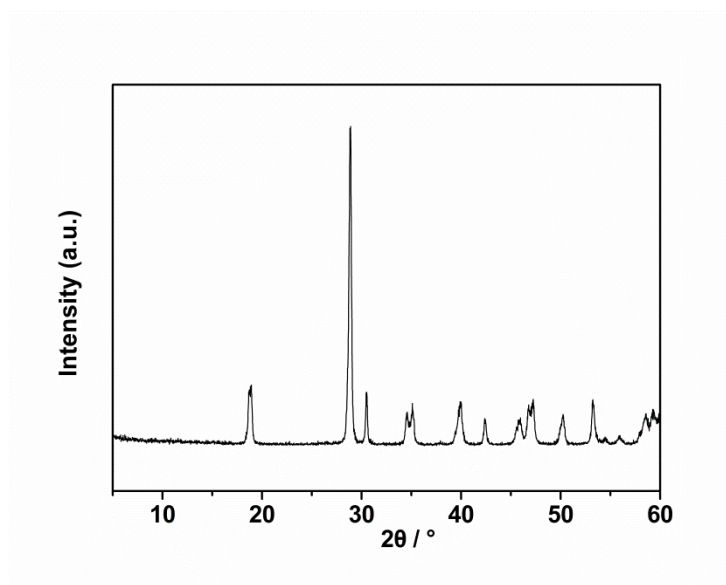

**Figure S3.** Powder XRD pattern of BiVO<sub>4</sub>-RGO composite.

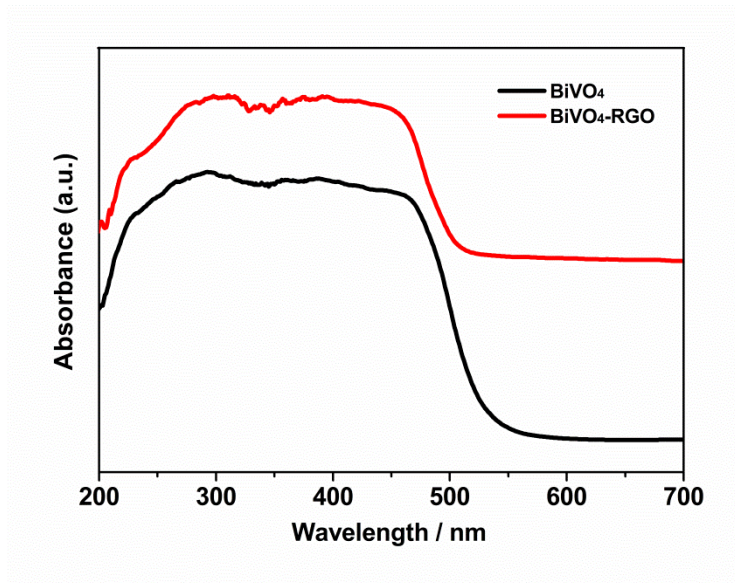

**Figure S4.** UV-vis diffuse reflectance spectra of BiVO<sub>4</sub>-RGO and BiVO<sub>4</sub>.

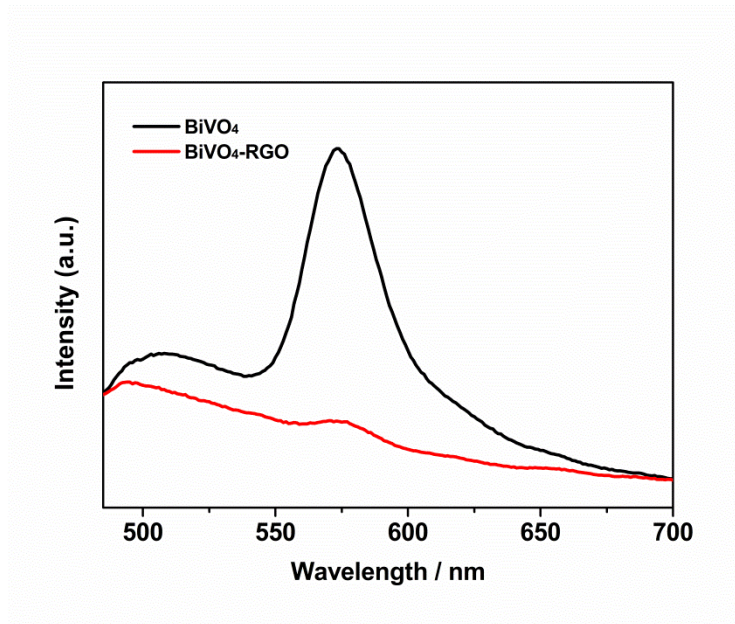

**Figure S5.** PL spectra of BiVO<sub>4</sub>-RGO and BiVO<sub>4</sub>.

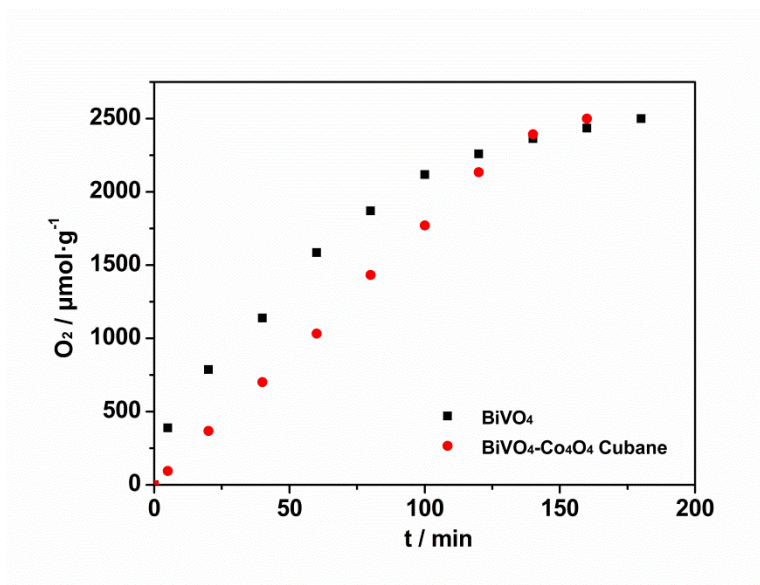

**Figure S6.** Time courses of the amount of evolved oxygen under visible light ( $\lambda > 420$  nm) irradiation of BiVO<sub>4</sub> (15 mg) (black) and a mixture of BiVO<sub>4</sub> (15 mg)/**1-H** (0.25 mM) (red), respectively, in aqueous AgNO<sub>3</sub> (15 mM) solutions; light source, 300 W Xe lamp equipped with a 420 nm cut-off filter.

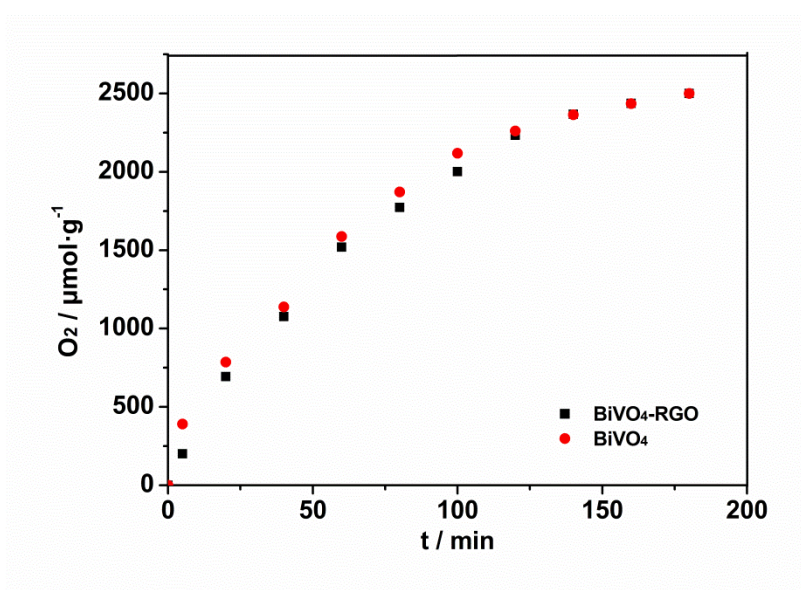

**Figure S7.** Time courses of the amount of evolved oxygen under visible light ( $\lambda > 420$  nm) irradiation of BiVO<sub>4</sub>-RGO (15 mg) (black) and BiVO<sub>4</sub> (15 mg) (red), respectively, in aqueous AgNO<sub>3</sub> (15 mM) solutions; light source, 300 W Xe lamp equipped with a 420 nm cut-off filter.



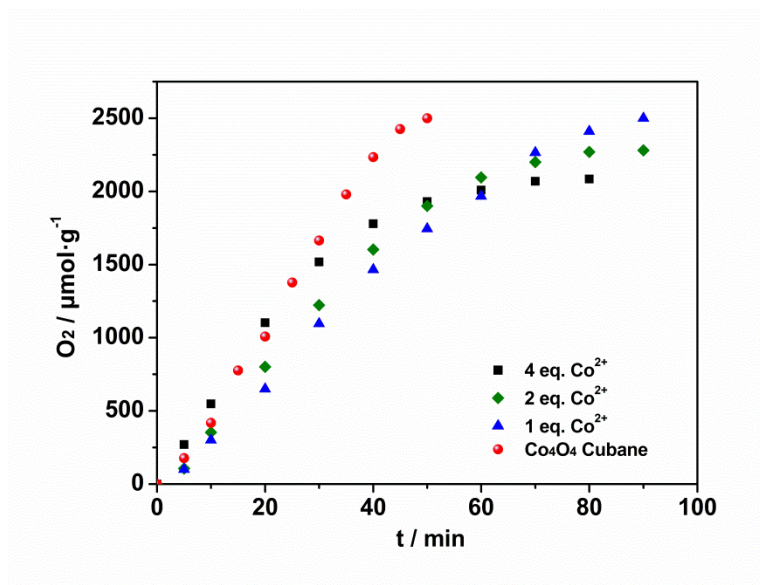

**Figure S8** Time courses of oxygen evolution by BiVO<sub>4</sub>-RGO (15 mg) in aqueous AgNO<sub>3</sub> (15 mM) solution under visible light ( $\lambda > 420$  nm) irradiation in the presence of **1-H** ( $2.5 \times 10^{-4}$  M) and different concentrations of Co(NO<sub>3</sub>)<sub>2</sub>, respectively. Red:  $2.5 \times 10^{-4}$  M **1-H**; blue:  $2.5 \times 10^{-4}$  M Co<sup>2+</sup>; green:  $5 \times 10^{-4}$  M Co<sup>2+</sup>; black:  $10^{-3}$  M Co<sup>2+</sup>.

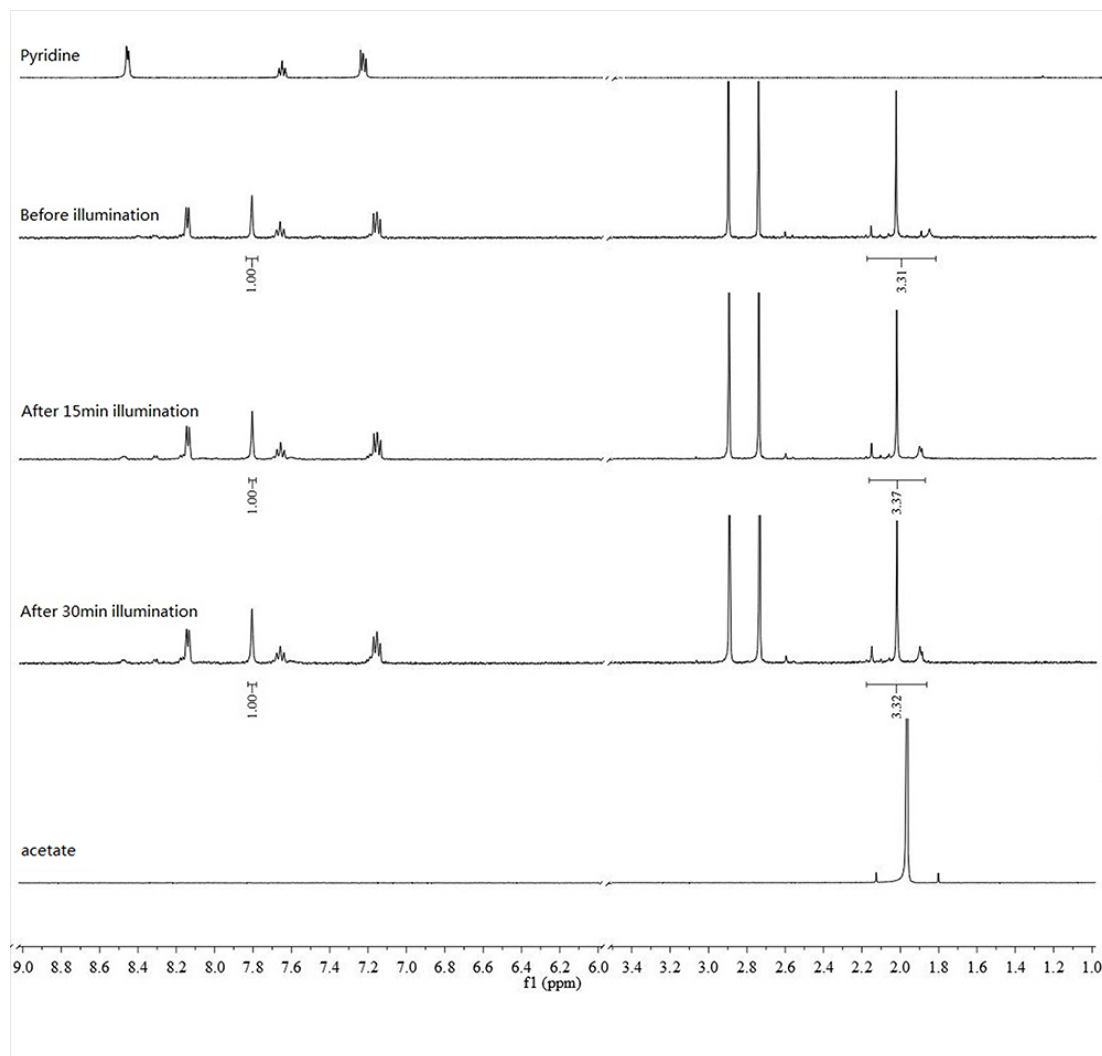

**Figure S9.** <sup>1</sup>H NMR spectra of **1-H** in D<sub>2</sub>O containing BiVO<sub>4</sub>-RGO and AgNO<sub>3</sub> under irradiation at t = 0, t = 15 min and t = 30 min. <sup>1</sup>H NMR spectra of free pyridine and acetate in D<sub>2</sub>O are also shown.



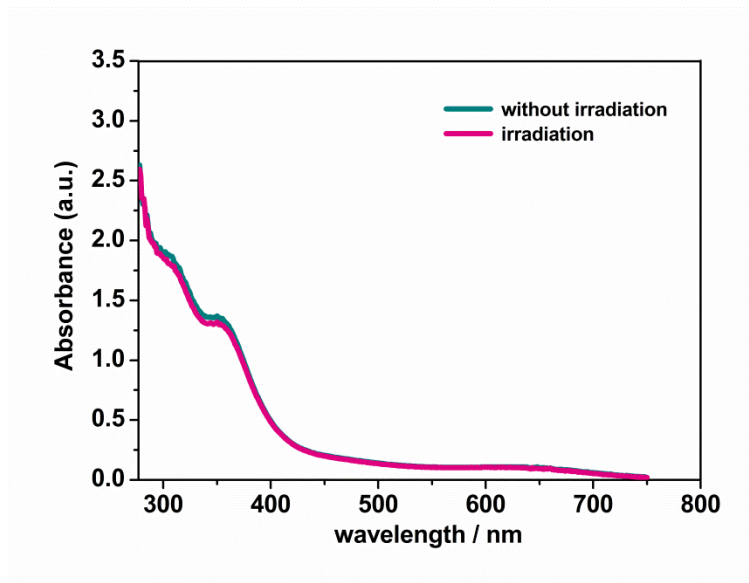

**Figure S10.** UV-vis spectra of **1-H** in water before and after photocatalytic water oxidation.

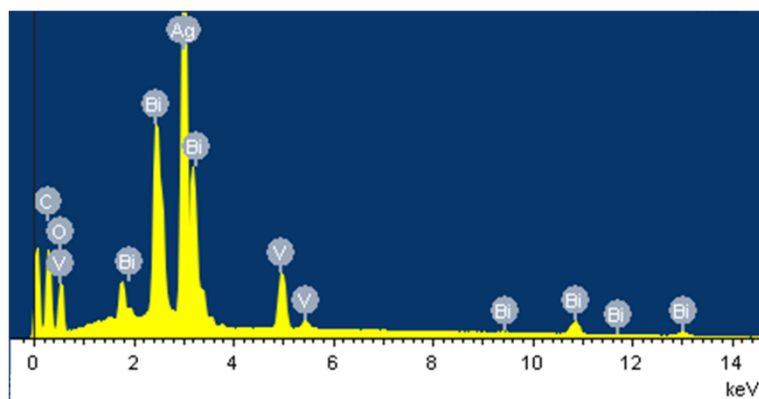

**Figure S11.** EDX spectra of BiVO<sub>4</sub>-RGO composite after the photocatalytic reaction.

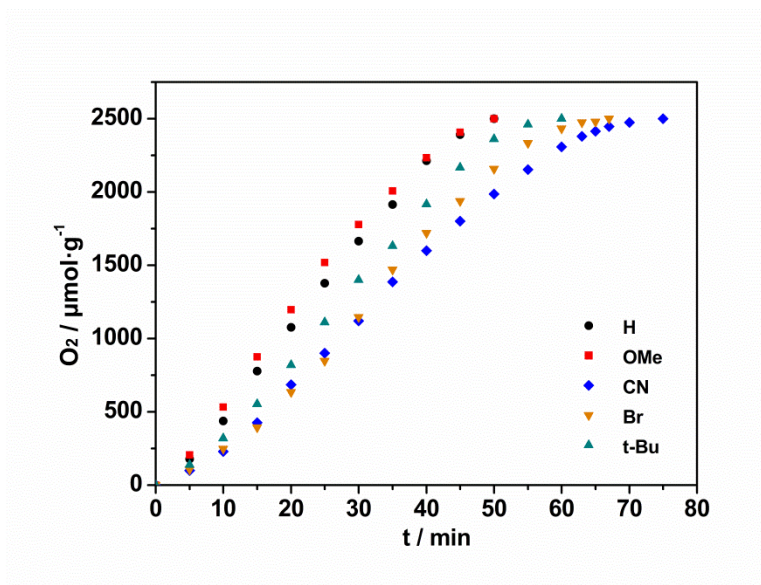

**Figure S12.** Time courses of oxygen evolution under visible light ( $\lambda > 420$  nm) irradiation of mixtures of **1-X** ( $2.5 \times 10^{-4}$  M) and  $\text{BiVO}_4\text{-RGO}$  (15 mg) in the presence of  $\text{AgNO}_3$  (15 mM)

**Table S1.** The  $\text{O}_2$  evolution rate of different cobalt catalyst in the hybrid system.<sup>a</sup>

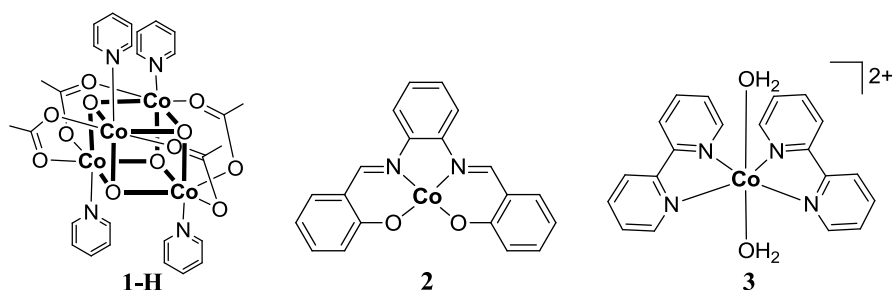

| Entry | Catalyst   | $\text{O}_2$ evolution rate ( $\mu\text{mol g}^{-1} \text{min}^{-1}$ ) <sup>b</sup> |
|-------|------------|-------------------------------------------------------------------------------------|
| 1     | --         | 13.9                                                                                |
| 2     | <b>1-H</b> | 55.6                                                                                |
| 3     | <b>2</b>   | 34.1                                                                                |
| 4     | <b>3</b>   | 20.4                                                                                |

<sup>a</sup> Reaction conditions: 15 mg  $\text{BiVO}_4\text{-RGO}$ ,  $2.5 \times 10^{-4}$  M cobalt complex, 10 mL  $\text{H}_2\text{O}$ , 300 W Xe lamp equipped with a 420 nm cut-off filter. <sup>b</sup>  $\text{O}_2$  evolution rate = the total amount of  $\text{O}_2$  evolved / the total time consumed.

## References

- 1 E. Pizzolato, M. Natali, B. Posocco, A. M. López, I. Bazzan, M. D. Valentin, P. Galloni, V. Conte, M. Bonchio, F. Scandola and A. Sartorel, *Chem. Commun.*, 2013, **49**, 9941.
- 2 C. F. Leung, S. M. Ng, C. C. Ko, W. L. Man, J. Wu, L. Chen and T. C. Lau, *Energy Environ. Sci.*, 2012, **5**, 7903.
- 3 Y. H. Ng, A. Iwase, A. Kudo and R. Amal, *J. Phys. Chem. Lett.*, 2010, **1**, 2607.
- 4 W. S. Hummers and R. E. Offeman, *J. Am. Chem. Soc.*, 1958, **80**, 1339.
- 5 R. Chakrabarty, S. J. Bora and B. K. Das, *Inorg. Chem.*, 2007, **46**, 9450.
